# Supplementary material
Source: PubMed Central journal article supplement (PMC4135406)
Supplement: ejhg2013292x1.pdf [file ejhg2013292x1.pdf]

## 1      **Supplementary Material**

2      Supplementary material is presented in PDF format and includes: detailed material and  
3      methods, two figures and figure legends, two tables, and references that are pointed in  
4      Table S1 (this table is a copy of Table 1, but including an extra column with references  
5      where *CDH1* mutations were identified).

6

## 7      **Supplementary Material and Methods**

### 8      *Plasmids construction – CDH1 mini-gene*

9      The CDH1 WT mini-gene (WTint) was obtained by introducing an intron 15 minimal  
10     sequence between exons 15 (L34788.1) and 16 (L34789.1) of *CDH1* (NM\_004360.3;  
11     ENST00000261769). This intronic sequence was obtained using the  
12     <http://www.cbs.dtu.dk/services/NetGene2/> online tool loaded with different portions of  
13     intron 15 sequences. The canonical donor and acceptor splice-sites of *CDH1* intron 15 were  
14     predicted to allow correct splicing even when deleting the intronic sequence between  
15     c.2439+111bp and c.2440-180bp. The intronic regions, upstream of c.2439+111bp and  
16     downstream of c.2440-180bp were obtained by PCR from NCI-N87 cell line genomic DNA  
17     and later reconnected. Nonsense 1003 C>T mutation was then introduced by site-directed  
18     mutagenesis (SDM) using primers indicated in Table S1.

19

### 20     *Plasmids construction – modified pIRES vector with sup-tRNA<sup>Arg</sup>*

21     To ensure each would have both genes, allowing the monitorization of sup-tRNA  
22     activity through E-cadherin expression, a new multiple cloning site (MCS) was first created  
23     in a region 919bp upstream the CMV promoter, after removing the original pIRES-EGFP2

24 MCS with blunt restriction enzymes AfeI and SmaI and the resulting ends were re-ligated.  
25 A SmaI restriction site was created in pIRES-EGFP2 vector by SDM (Table S1). The new  
26 MCS was designed (Figure 1a and Figure S1), amplified by PCR, digested with SmaI and  
27 HpaI (New England BioLabs, Ipswich, MA) and introduced in the SmaI restriction site.

28 Then, an arginine tRNA sequence [chr15.trna4 (87679308-87679380), Genomic tRNA  
29 Database - hg18 - NCBI Build 36.1 Mar 2006], flanked by 111bp upstream and 157bp  
30 downstream (primers sequence in Table S1), was amplified and inserted in the new MCS  
31 from pIRES-EGFP2 vector through AfeI and SacI (New England Biolabs, Ipswich, MA)  
32 restriction sites. The nonsense mutation was created in the anticodon of sup-tRNA<sup>Arg</sup> by  
33 SDM (Table S1).

34 Vectors containing both sup-tRNA and CDH1 sequences were cloned through NdeI and  
35 NotI (New England Biolabs, Ipswich, MA) restriction sites.

36 All restriction reactions were purified from 1% agarose gel with illustra GFX PCR DNA  
37 and Gel Band Purification kit (GE Healthcare, Little Chalfont, UK). Purified fragments  
38 were cloned into vectors by T4 ligase (Invitrogen, Carlsbad, CA) and expanded through  
39 One Shot® Stbl3<sup>TM</sup> Chemically Competent *E. coli* (Invitrogen, Carlsbad, CA) according  
40 with the manufacturer's instructions.

41

#### 42 *Protein extraction and Western blotting*

43 Cells were lysed in cold catenin lysis buffer (1% Triton X-100, 1% Nonidet P-40 in PBS)  
44 supplemented with a protease inhibitor cocktail (Roche, Mannheim, Germany) and a  
45 phosphatase inhibitor cocktail (Sigma, St. Louis, MO). Protein concentration was

46 determined by Bradford-modified assay (DC Protein Assay, Bio-Rad Laboratories).

47 For analysis of total cellular proteins, 35µg of protein extracts were separated by 7.5%  
48 sodium dodecylsulphate–polyacrylamide gel electrophoresis (SDS–PAGE) and  
49 electroblotted onto a Hybond nitrocellulose ECL membrane (GE Healthcare, Little  
50 Chalfont, UK). Membranes were blocked with 5% non-fat milk and PBS 0.5% Tween-20  
51 in for 30 minutes and incubated with antibodies against E-cadherin SHE78-7 (Enzo Life  
52 Sciences Inc.) (1:1000),  $\alpha$ -tubulin (1:10000, Sigma) and GFP (1:500, SantaCruz  
53 Biotechnology Inc.) for 1h at RT. Membranes were washed with PBS 0.5% Tween-20, and  
54 incubated with the secondary antibody appropriate anti-rabbit IgG or anti-mouse IgG  
55 conjugated to horseradish peroxidase (GE Healthcare, Little Chalfont, UK). Signal was  
56 detected by ECL chemiluminescence (GE Healthcare, Little Chalfont, UK). Band intensity  
57 quantification was determined using densitometry software (Quantity One, version 4.6.2,  
58 Bio-Rad Laboratories).

59

### 60 *Immunocytochemistry*

61 Cells were seeded on glass coverslips and grown to at least 80% confluence. Then, cells  
62 were fixed in formaldehyde (4% in PBS) for 20 minutes, washed and incubated with NH<sub>4</sub>Cl  
63 (50 mM) and were then permeated with PBS-0,2 % Triton X-100. Coverslips were then  
64 blocked with 5% BSA (Sigma, St. Louis, MO) in PBS for 30 min at room temperature  
65 (RT), and incubated with primary antibodies anti-E-cadherin SHE78-7 (mouse, 1:100, Enzo  
66 Life Sciences Inc.), diluted in 5% BSA-PBS for 1h at RT. After washing with PBS,  
67 coverslips were incubated with anti-mouse AlexaFluor 594 secondary antibody (1:500,

68 Invitrogen, Carlsbad, CA) for 1h at RT in the dark. Coverslips were washed in PBS and  
69 mounted with Vectashield/DAPI (Vector Laboratories Inc). Images were captured using a  
70 Zeiss Imager Z1 fluorescence microscope, equipped with ApoTome, and supplied with  
71 Axiovision Rel 4.8 software (Carl Zeiss Inc).

72

### 73 *Cell sorting and flow cytometry*

74 To collect GFP-expressing population, cells were then washed and re-suspended in PBS-  
75 0,02%EDTA-0,5%BSA (freshly made).  $5 \times 10^5$  cells were taken and washed twice in the  
76 same re-suspension buffer and submitted to cytometer reading. To collect E-cadherin-  
77 expressing population, detached cells were washed with PBS-CaCl<sub>2</sub>-3%BSA and incubated  
78 for 30 min in the primary antibody anti-E-cadherin HECD1 (mouse, 1:100, Zymed  
79 Laboratories Inc.) at 4°C. Cells were then washed twice and incubated for 15 min with anti-  
80 mouse Alexa Fluor 647 secondary antibody (Invitrogen, Carlsbad, CA), at 4°C in the dark.  
81 Finally, cells were washed with PBS-CaCl<sub>2</sub>-3%BSA-0,02%EDTA and submitted to  
82 cytometer reading.

83 For analysis of E-cadherin and GFP expressing cells by flow cytometry, detached cells  
84 were washed with PBS-CaCl<sub>2</sub>-3%BSA and incubated for 1h in the primary antibody anti-  
85 E-cadherin HECD1 (mouse, 1:100, Zymed Laboratories Inc.) at 4°C. Cells were then  
86 washed twice and incubated for 30 min with anti-mouse Alexa Fluor 647 secondary  
87 antibody (1:400, Invitrogen, Carlsbad, CA), at 4°C in the dark. Cells were washed with  
88 PBS-CaCl<sub>2</sub>-3%BSA-0,02%EDTA, then with PBS, fixed with 2% formaldehyde and  
89 submitted to reading in a FACS Calibur flow cytometer (BD Biosciences). Flow cytometry  
90 results were analysed by FlowJo software version 8.7.3.

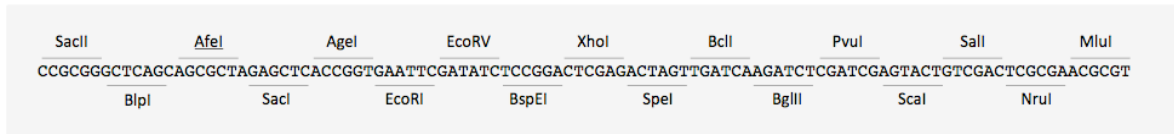

92 **Figure S1.** New multiple-cloning site (MCS). The new MCS was designed and inserted  
 93 919bp upstream of the CMV promoter. A PCR amplified gDNA fragment containing the  
 94 Arg tRNA gene sequence plus 111bp (upstream) and 157bp (downstream) flanking regions  
 95 was then inserted into the new MCS. This was intended to avoid interference between the  
 96 tRNA (Pol III) and CMV promoters (Pol II), and to allow for the combined expression of  
 97 tRNA and *CDHI* from the same plasmid.

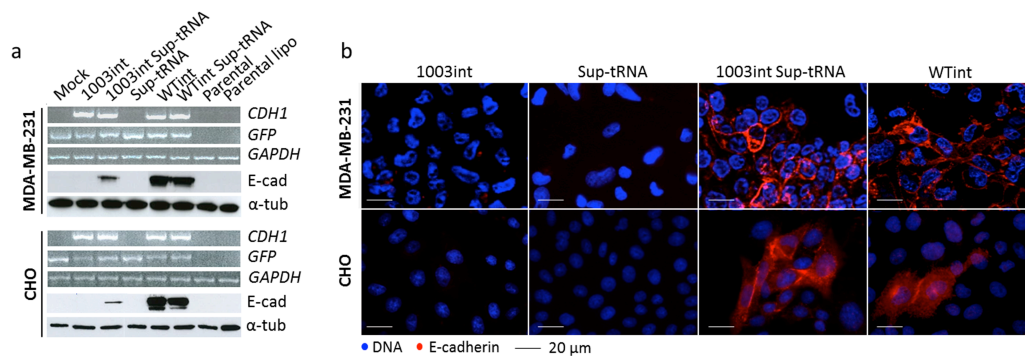

100 **Figure S2.** Suppressor-tRNA restores E-cadherin expression in MDA-MB-231 and  
 101 CHO cell lines. (a) MDA-MB-231 and CHO cells transiently transfected with pIRES-  
 102 EGFP2 modified vectors: mock-MCS, 1003int, 1003int\_sup-tRNA<sup>Arg</sup>, Sup-tRNA<sup>Arg</sup>,  
 103 WTint, WTint\_sup-tRNA<sup>Arg</sup>, 1003cDNA, 1003cDNA\_sup-tRNA<sup>Arg</sup>, WTcDNA,  
 104 WTcDNA\_sup-tRNA<sup>Arg</sup> and parental cells, treated and not treated with  
 105 Lipofectamine2000. RNA expression was analysed by RT-PCR for *CDHI* transcripts,  
 106 using GFP expression transfection control, and GAPDH as endogenous RNA control  
 107 (upper panel). Protein expression was detected by WB, using  $\alpha$ -tubulin as endogenous

108 control (lower panel); **(b)** Immunocytochemistry in cells stably transfected with  
109 1003int\_sup-tRNA<sup>Arg</sup>, showing E-cadherin expression localized at the membrane, while  
110 control cells 1003int do not have any expression (amplification 40x).

111

112

113

114 **Table S1.** Primers used for PCR amplifications.

115

| PCR                         | Primer           | Sequence                                      |
|-----------------------------|------------------|-----------------------------------------------|
| <i>CDH1</i> mini-gene       | CDH1_Nhe_F       | 5'-GCTAGCATGGGCCCTTGGAGCCCAG-3'               |
|                             | Pr2R             | 5'-CTCGAGCTAGTCGTCCTCGCCGCCTCCGTACAT-3'       |
| Arginine-tRNA               | tRNAarg_F        | 5' – CAGTGATATCCCAACCTCCCCTTCTCAAG – 3'       |
|                             | tRNAarg_R        | 5' – AGCAAGTCCCTGCGAGATTTCCGGAAGT – 3'        |
| SDM <i>CDH1</i> _1003       | 1003sdm_F/R      | 5' – GTCACCACTGGGCTGGACtGAGAGAGTTTCC – 3'     |
| SmaI_SMD                    | SmaI_F/R         | 5' – CCCCAAGTTCccGGGTGAAGGCCAGGGCTCGCAGC – 3' |
| SDM Sup-tRNA <sup>Arg</sup> | SuptRNA_1003_F/R | 5' – GATAAGGCGTCTGACTTCaGATCAGAAGATTGCAG – 3' |

116

117

118

119 **Table S2.** Nonsense mutations described in HDGC, LBC families and EODGC cases  
 120 that could be targeted by suppressor-tRNAs (complete data with references).

|              | Gene          | Protein       | <i>CDH1</i> | Normal | Original   | Generated | References |
|--------------|---------------|---------------|-------------|--------|------------|-----------|------------|
|              | Domain        | Domain        | Mutation    | codon  | amino acid | PTC       |            |
| <b>HDGC</b>  | Exon 2        | Signal        | c.59G>A     | TGG    | Trp        | TAG       | 1          |
|              | Exon 2        | Signal        | c.70G>T     | GAG    | Glu        | TAG       | 2          |
|              | Exon 3        | Precursor     | c.187C>T    | CGA    | Arg        | TGA       | 3          |
|              |               |               |             |        |            |           | 4          |
|              |               |               |             |        |            |           | 5          |
|              | Exon 3        | Precursor     | c.190C>T    | CAA    | Gln        | TAA       | 2          |
|              | Exon 3        | Precursor     | c.283C>T    | CAG    | Gln        | TAG       | 6          |
|              |               |               |             |        |            |           | 7          |
|              | Exon 4        | Precursor     | c.489C>A    | TGC    | Cys        | TGA       | 5          |
|              | Exon 5        | Extracellular | c.586G>T    | GGA    | Gly        | TGA       | 2          |
|              | Exon 7        | Extracellular | c.1003C>T   | CGA    | Arg        | TGA       | 8          |
|              |               |               |             |        |            |           | 3          |
|              | Exon 8        | Extracellular | c.1023T>G   | TAT    | Tyr        | TAG       | 9          |
|              | Exon 10       | Extracellular | c.1507C>T   | CAG    | Gln        | TAG       | 6          |
|              |               |               |             |        |            |           | 10         |
|              | Exon 12       | Extracellular | c.1792C>T   | CGA    | Arg        | TGA       | 4          |
|              |               |               |             |        |            | 11        |            |
|              |               |               |             |        |            | 3         |            |
| Exon 12      | Extracellular | c.1913G>A     | TGG         | Trp    | TAG        | 6         |            |
| Exon 13      | Extracellular | c.2095C>T     | CAG         | Gln    | TAG        | 9         |            |
|              |               |               |             |        |            | 3         |            |
| Exon 14      | Cytoplasmic   | c.2275G>T     | GGA         | Gly    | TGA        | 12        |            |
| Exon 14      | Cytoplasmic   | c.2287G>T     | GAG         | Glu    | TAG        | 9         |            |
| <b>EODGC</b> | Exon 12       | Extracellular | c.1792C>T   | CGA    | Arg        | TGA       | 13         |
| <b>LBC</b>   | Exon 3        | Precursor     | c.283C>T    | CAG    | Gln        | TAG       | 14         |

121 **Footnote:** TAG = amber; TGA = opal; TAA = ochre; arginine = Arg; glutamine = Gln; glycine = Gly;  
 122 glutamic acid = Glu; tryptophan = Trp; tyrosine = Tyr; and cysteine = Cys.

123



124 **Supplementary References (Table S2)**

- 125 1. Richards FM, McKee SA, Rajpar MH *et al*: Germline E-cadherin gene (CDH1)  
126 mutations predispose to familial gastric cancer and colorectal cancer. *Hum Mol*  
127 *Genet* 1999. **8**: 607-10.
- 128 2. Oliveira C, Seruca R, Carneiro F: Genetics, pathology, and clinics of familial  
129 gastric cancer. *Int J Surg Pathol* 2006. **14**: 21-33.
- 130 3. Suriano G, Yew S, Ferreira P *et al*: Characterization of a recurrent germ line  
131 mutation of the E-cadherin gene: implications for genetic testing and clinical  
132 management. *Clin Cancer Res* 2005. **11**: 5401-9.
- 133 4. Gayther SA, Goringe KL, Ramus SJ *et al*: Identification of germ-line E-cadherin  
134 mutations in gastric cancer families of European origin. *Cancer Res* 1998. **58**:  
135 4086-9.
- 136 5. Kluijt I, Siemerink EJ, Ausems MG *et al*: CDH1-related hereditary diffuse gastric  
137 cancer syndrome: clinical variations and implications for counseling. *Int J Cancer*  
138 2012. **131**: 367-76.
- 139 6. Kaurah P, MacMillan A, Boyd N *et al*: Founder and recurrent CDH1 mutations in  
140 families with hereditary diffuse gastric cancer. *JAMA* 2007. **297**: 2360-72.
- 141 7. Dussaulx-Garin L, Blayau M, Pagenault M *et al*: A new mutation of E-cadherin  
142 gene in familial gastric linitis plastica cancer with extra-digestive dissemination.  
143 *Eur J Gastroenterol Hepatol* 2001. **13**: 711-5.
- 144 8. Jonsson BA, Bergh A, Stattin P, Emmanuelsson M, Gronberg H: Germline  
145 mutations in E-cadherin do not explain association of hereditary prostate cancer,  
146 gastric cancer and breast cancer. *Int J Cancer* 2002. **98**: 838-43.

- 147 9. Guilford P, Humar B, Blair V: Hereditary diffuse gastric cancer: translation of  
148 CDH1 germline mutations into clinical practice. *Gastric Cancer* 2010. **13**: 1-10.
- 149 10. Jiang Y, Wan YL, Wang ZJ, Zhao B, Zhu J, Huang YT: [Germline E-cadherin gene  
150 mutation screening in familial gastric cancer kindreds]. *Zhonghua Wai Ke Za Zhi*  
151 2004. **42**: 914-7.
- 152 11. Humar B, Graziano F, Cascinu S *et al*: Association of CDH1 haplotypes with  
153 susceptibility to sporadic diffuse gastric cancer. *Oncogene* 2002. **21**: 8192-5.
- 154 12. Ghaffari SR, Dastan J, Rafati M, Sabokbar T: Novel human pathological mutations.  
155 Gene symbol: CDH1. Disease: gastric cancer. *Hum Genet* 2009. **125**: 337.
- 156 13. Shah MA, Salo-Mullen E, Stadler Z *et al*: De novo CDH1 mutation in a family  
157 presenting with early-onset diffuse gastric cancer. *Clin Genet* 2012. **82**: 283-7.
- 158 14. Xie ZM, Li LS, Laquet C *et al*: Germline mutations of the E-cadherin gene in  
159 families with inherited invasive lobular breast carcinoma but no diffuse gastric  
160 cancer. *Cancer* 2011. **117**: 3112-7.

161

162
